# Supplementary material for: Effect of porcine reproductive and respiratory syndrome virus 2 on angiogenesis and cell proliferation at the maternal-fetal interface
Source: PubMed Central journal article supplement — Vet Pathol. 2022 Jun 20;59(6):940–9. doi: 10.1177/03009858221105053 (PMC9530517; doi:10.1177/03009858221105053), 2022-06-20
Supplement: sj-pdf-1-vet-10.1177_03009858221105053.pdf [file sj-pdf-1-vet-10.1177_03009858221105053.pdf]

*Veterinary Pathology: Supplemental Materials*  
 Barrera-Zarate et al. Effect of porcine reproductive and respiratory syndrome virus 2  
 on angiogenesis and cell proliferation at the maternal-fetal interface.

Supplementary Figure S1. Fetal distribution map for angiogenesis (VEGF) analysis.

| GILT | L1   | L2 | L3   | L4   | L5  | L6   | L7   | L8  | R9  | R8 | R7  | R6  | R5  | R4 | R3  | R2   | R1 |
|------|------|----|------|------|-----|------|------|-----|-----|----|-----|-----|-----|----|-----|------|----|
| G186 |      |    |      |      |     | UNIF | UNIF |     |     |    |     |     |     |    |     |      |    |
| G187 | HVL  |    | MEC  |      |     |      |      |     |     |    |     |     |     |    | MEC |      |    |
| G188 |      |    |      | UNIF |     |      |      |     |     |    |     |     |     |    |     |      |    |
| G189 |      |    | MEC  | HVL  |     |      |      |     |     |    |     |     |     |    |     |      |    |
| G191 |      |    |      |      |     | CON  |      |     |     |    |     |     |     |    |     |      |    |
| G192 |      |    |      |      |     |      |      |     |     |    |     |     |     |    |     | UNIF |    |
| G196 |      |    |      |      |     |      |      |     |     |    |     | MEC |     |    |     |      |    |
| G197 |      |    |      |      | CON |      |      |     |     |    |     |     |     |    |     | CON  |    |
| G200 |      |    | CON  |      |     |      |      |     |     |    |     |     |     |    |     |      |    |
| G201 |      |    | MEC  |      |     |      |      |     |     |    |     |     |     |    |     | UNIF |    |
| G203 |      |    | UNIF |      |     |      | MEC  |     |     |    |     |     |     |    |     |      |    |
| G204 | UNIF |    |      |      |     |      |      |     |     |    |     |     |     |    |     |      |    |
| G206 |      |    |      |      |     |      |      |     |     |    |     |     | CON |    |     | CON  |    |
| G207 |      |    |      |      |     |      |      | HVL |     |    |     |     | HVL |    |     |      |    |
| G208 | UNIF |    |      |      |     | MEC  |      |     |     |    |     |     |     |    |     |      |    |
| G211 |      |    |      |      |     | HVL  |      |     |     |    |     |     |     |    |     |      |    |
| G212 |      |    |      |      |     |      |      |     |     |    |     |     |     |    | CON |      |    |
| G213 |      |    |      |      |     |      |      |     | HVL |    |     |     |     |    |     |      |    |
| G216 |      |    | HVL  |      |     |      |      |     |     |    | MEC |     |     |    |     |      |    |
| G218 |      |    |      |      |     |      |      |     |     |    |     | CON |     |    |     | CON  |    |
| G219 |      |    |      |      |     |      |      |     | HVL |    |     |     |     |    |     |      |    |
| G221 | UNIF |    |      |      |     | HVL  |      |     |     |    |     |     |     |    | HVL |      |    |

Individual cells represent the position of each fetus. Fetal location within the left (L) and right (R) uterine horns is specified along the header (L1-L8, R1-R9). Each row represents gilt identity listed in the left column. CON= control fetuses, UNIF= uninfected fetuses, HVL= High viral load fetuses, MEC= meconium fetuses.

*Veterinary Pathology: Supplemental Materials*  
 Barrera-Zarate et al. Effect of porcine reproductive and respiratory syndrome virus 2  
 on angiogenesis and cell proliferation at the maternal-fetal interface.

Supplementary Figure S2. Fetal distribution map for cell proliferation (Ki67) analysis.

| GILT | L1   | L2  | L3   | L4   | L5 | L6  | L7   | L8  | R9  | R8 | R7  | R6  | R5   | R4  | R3  | R2   | R1   |
|------|------|-----|------|------|----|-----|------|-----|-----|----|-----|-----|------|-----|-----|------|------|
| G185 |      | CON |      |      |    |     |      |     |     |    |     |     |      |     |     |      |      |
| G186 |      |     |      |      |    |     | UNIF |     |     |    |     |     |      |     |     |      |      |
| G187 | HVL  |     | MEC  |      |    |     |      |     |     |    |     |     |      |     | MEC |      |      |
| G189 |      |     | MEC  | HVL  |    |     |      |     |     |    |     |     |      |     | MEC |      |      |
| G191 |      |     |      |      |    | CON |      |     |     |    |     |     | CON  |     |     |      |      |
| G196 |      |     |      |      |    |     |      |     |     |    |     | MEC |      |     |     |      |      |
| G200 |      |     | CON  |      |    |     |      |     |     |    |     |     |      |     |     |      |      |
| G201 |      |     | MEC  |      |    |     |      |     |     |    |     |     |      |     |     | UNIF |      |
| G202 |      |     |      | UNIF |    |     |      |     |     |    |     |     |      |     |     |      |      |
| G203 |      |     | UNIF |      |    |     | MEC  |     |     |    |     |     |      |     |     |      |      |
| G204 | UNIF |     |      |      |    |     |      |     |     |    |     |     |      |     |     |      |      |
| G206 |      |     |      |      |    |     |      |     |     |    |     |     | CON  |     |     | CON  |      |
| G207 |      |     |      |      |    |     |      | HVL |     |    |     |     | HVL  |     |     |      | UNIF |
| G208 | UNIF |     |      |      |    |     | MEC  |     |     |    |     |     | UNIF |     |     |      |      |
| G211 |      |     |      |      |    |     | HVL  |     |     |    |     |     |      |     |     |      |      |
| G212 |      | CON |      |      |    |     |      |     |     |    |     |     |      |     | CON |      |      |
| G213 |      |     |      |      |    |     |      |     | HVL |    |     |     |      |     |     |      |      |
| G216 |      |     | HVL  |      |    | MEC |      |     |     |    | MEC |     |      |     |     |      |      |
| G218 |      |     |      |      |    |     |      |     |     |    |     | CON |      |     |     | CON  |      |
| G219 |      |     |      |      |    |     |      |     | HVL |    |     |     |      |     |     | UNIF |      |
| G221 | UNIF |     |      |      |    |     | HVL  |     |     |    |     |     |      | HVL |     |      |      |

Individual cells represent the position of each fetus. Fetal location within the left (L) and right (R) uterine horns is specified along the header (L1-L8, R1-R9). Each row represents gilt identity listed in the left column. CON= control fetuses, UNIF= uninfected fetuses, HVL= High viral load fetuses, MEC= meconium fetuses.

*Veterinary Pathology: Supplemental Materials*

Barrera-Zarate et al. Effect of porcine reproductive and respiratory syndrome virus 2 on angiogenesis and cell proliferation at the maternal-fetal interface.

Supplemental Table S1. Primary antibodies used for detection of angiogenesis (VEGF) and cell proliferation (Ki67)

| <b>Target</b> | <b>Host species</b> | <b>Concentration</b> | <b>Dilution</b> | <b>Microscope channel</b> | <b>Exposure</b> | <b>Antigen Retrieval</b> |
|---------------|---------------------|----------------------|-----------------|---------------------------|-----------------|--------------------------|
| <b>VEGF</b>   | rabbit              | 6.4 ug/ml            | 1:50            | Cy5                       | 300 ms          | Tris-EDTA<br>ph9.0       |
| <b>Ki67</b>   | mouse               | 0.46 ug/ml           | 1:100           | RFP                       | 2 s             | Tris-EDTA<br>ph9.0       |
| <b>TJP1</b>   | rat                 | 2ug/ml               | 1:200           | GFP                       | 500 ms          | Tris-EDTA<br>ph9.0       |

Legend: VEGF= vascular endothelial growth factor, TJP1= tight junction protein 1 (zonula occludens 1)

Supplemental Table S2. Secondary antibodies used for detection of angiogenesis (VEGF) and cell proliferation (Ki67)

| <b>Target</b>                 | <b>Concentration</b> | <b>Dilution</b> | <b>Microscope channel</b> | <b>Exposure</b> |
|-------------------------------|----------------------|-----------------|---------------------------|-----------------|
| <b>Donkey anti-rabbit-IgG</b> | 5 ug/ml              | 1:200           | Cy5                       | 300 ms          |
| <b>Donkey anti-mouse-IgG</b>  | 5 ug/ml              | 1:200           | RFP                       | 2 s             |
| <b>Donkey anti-rat-IgG</b>    | 5 ug/ml              | 1:200           | GFP                       | 500 ms          |
